# Supplementary material
Source: MDPI journal article supplement (https://www.mdpi.com/2076-3417/11/23/11390)
Supplement: s1 [file s1]

Article

# Particulate Matter Contamination of Bee Pollen in an Industrial Area of the Po Valley (Italy)

Giulia Papa <sup>1</sup>, Giancarlo Capitani <sup>2</sup>, Marco Pellecchia <sup>3</sup>, Ilaria Negri <sup>1,\*</sup>

<sup>1</sup> Dipartimento di Scienze delle Produzioni Vegetali Sostenibili (DIPROVES), Università Cattolica del Sacro Cuore, 29122 Piacenza, Italy; giulia.papa@unicatt.it

<sup>2</sup> Dipartimento di Scienze dell'Ambiente e della Terra (DISAT), Università Milano Bicocca, 20126 Milano, Italy; giancarlo.capitani@unimib.it

<sup>3</sup> KOINE, Consulenze Ambientali, 43022 Montechiarugolo, Italy; marcopellecchia@koineambiente.com

\* Correspondence: ilaria.negri@unicatt.it; Tel.: +30-0523599374

## Supplementary Figures

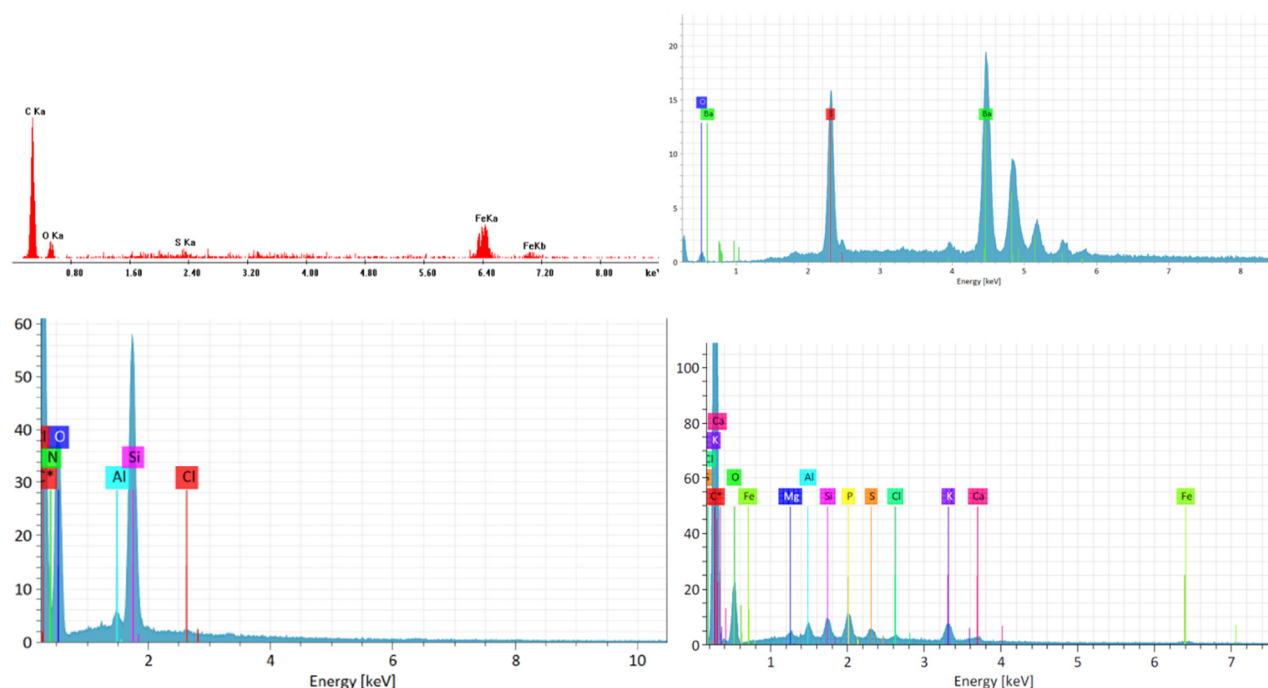

**Supplementary Figure S1:** from left to right, representative EDX spectra of particles of iron oxides/hydroxides, barite, quartz, and of a clay mineral.

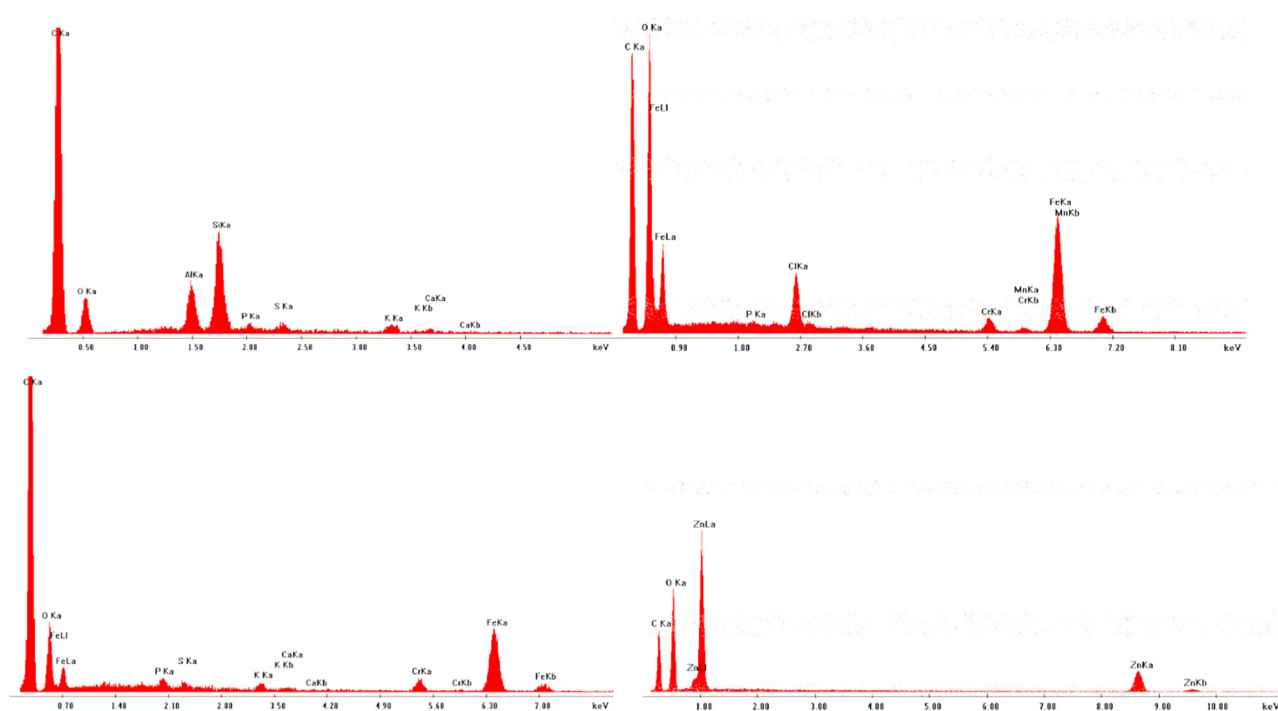

**Supplementary Figure S2:** from left to right, representative EDX spectra of a feldspar, a Fe-Cr alloy, a Fe-Cr-Mn alloy, and metallic Zn.

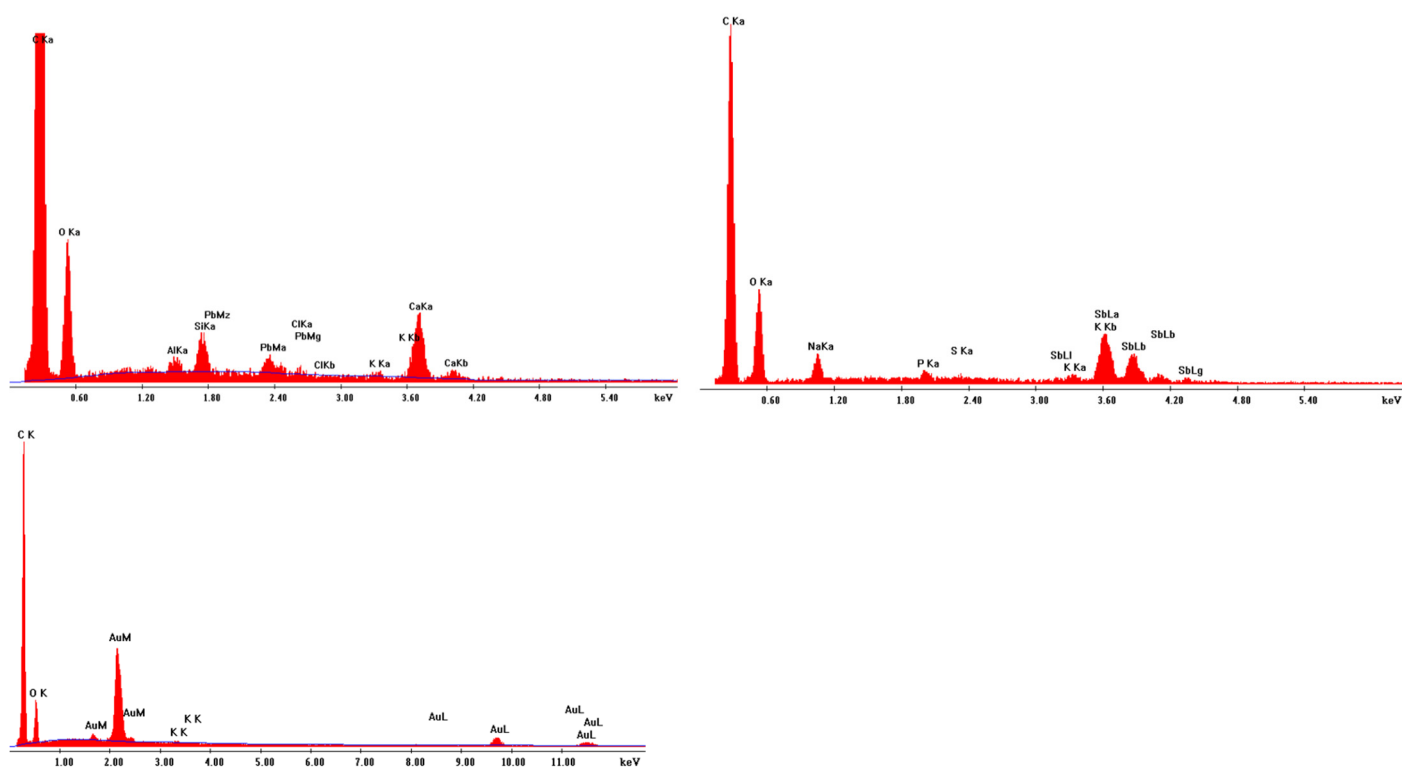

**Supplementary Figure S3:** from left to right, representative EDX spectra of a particle containing Pb, antimony oxide, and gold.
